# Supplementary material
Source: PubMed Central journal article supplement (PMC9233095)

## SUPPLEMENTAL MATERIALS

### Supplemental Figures

**Figure S1. Multivariable Model for Survival to Hospital Admission.** Patient-level predictors for the outcome of survival to hospital admission are depicted in this forest plots. Estimates were derived using hierarchical regression, with EMS agency as a random effect. These model estimates were used to calculate risk-standardized rates of survival to hospital admission for each EMS agency in the study cohort. Abbreviations: CPR, cardiopulmonary resuscitation; EMS, emergency medical service; PEA, pulseless electrical activity.

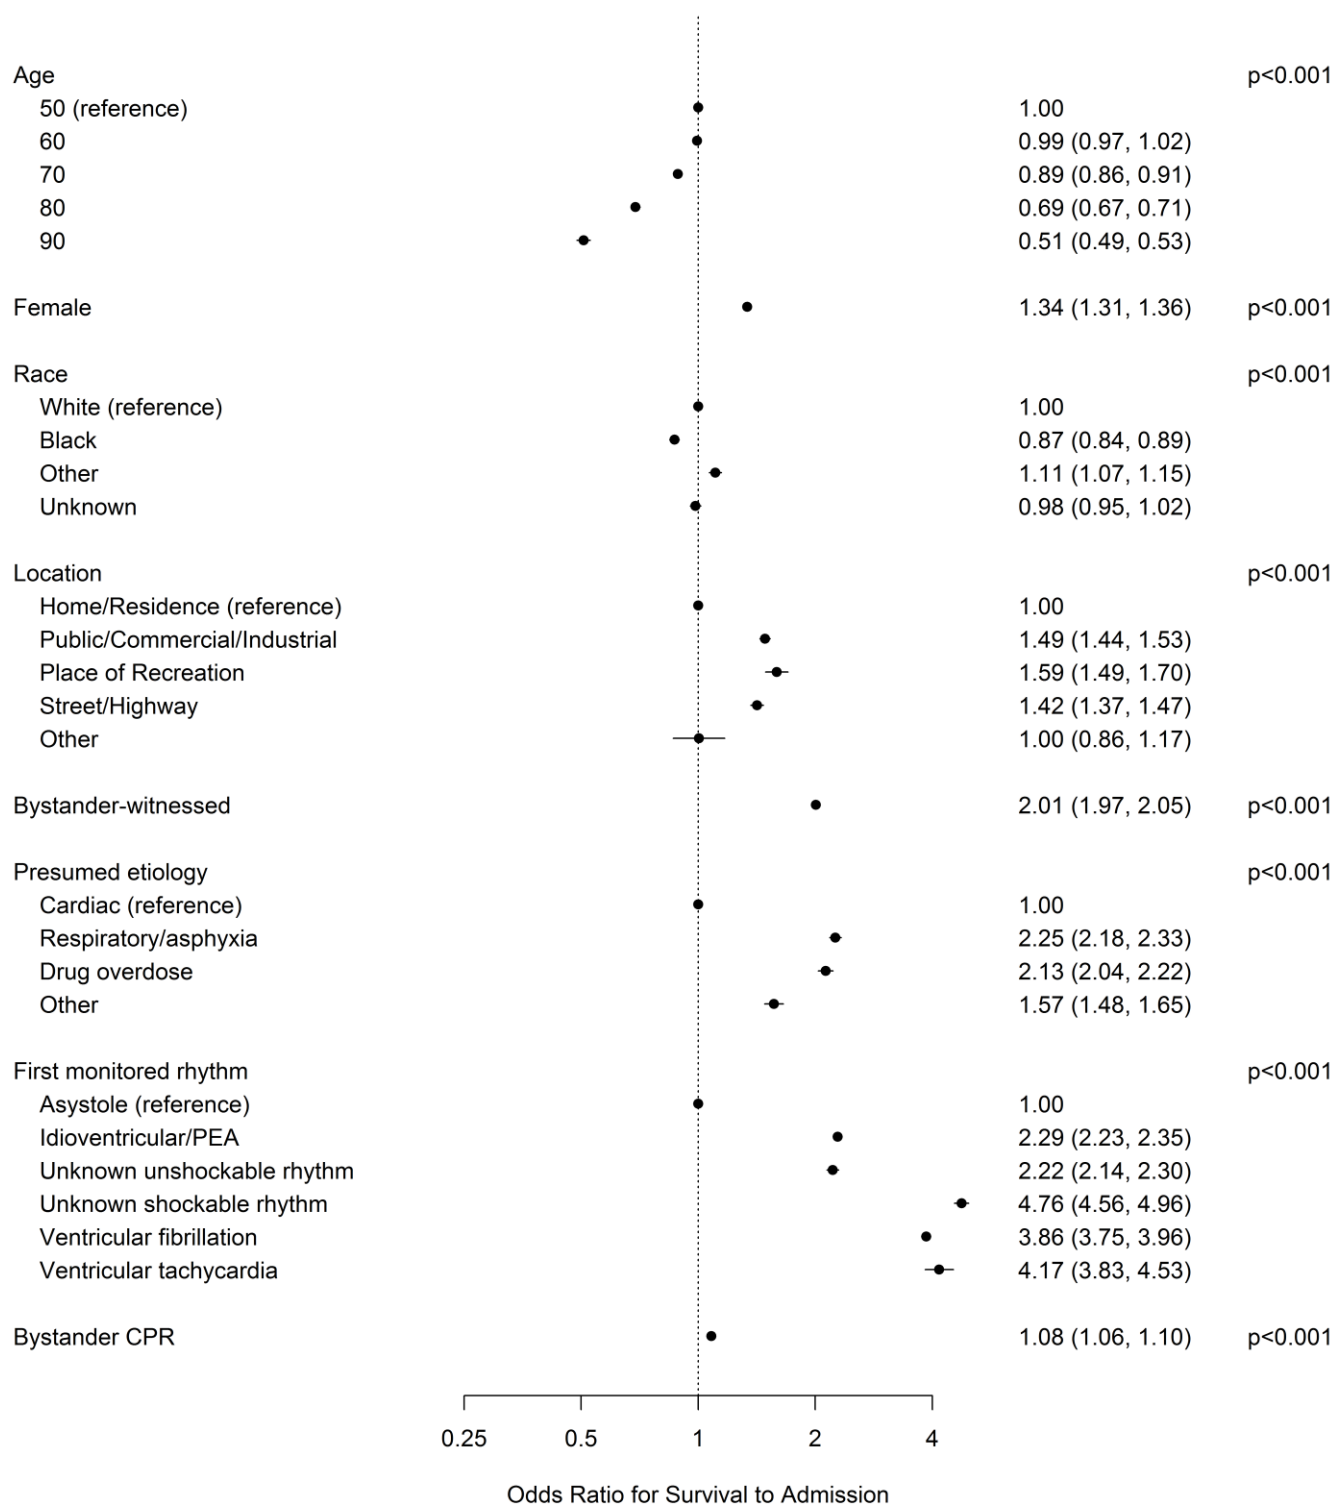

Supplement: NIHMS1800375-supplement-Final_Supp.pdf [file NIHMS1800375-supplement-Final_Supp.pdf]
